# Supplementary material for: Changes in head staff members in male elite-level football teams are associated with increased hamstring injury burden for that season: the UEFA Elite Club Injury Study
Source: PubMed Central journal article supplement (PMC10660205; doi:10.1136/bmjsem-2023-001640), 2023-11-15
Supplement: bmjsem-2023-001640supp001.pdf [file bmjsem-2023-001640supp001.pdf]

**Box 1.** Survey questions

---

1. Please, enter the Code number of your club or your initials.
  2. Did you have a change of head coach before the 2019/20 season (= a new coach for the season)?
  3. Did you have a change of head coach during the 2019/20 season?
  4. If answered Yes at question 3: in which month did the change of head coach occur?
  5. Did you have a change of performance/fitness coach before the 2019/20 season (= a new performance/fitness coach for the season)?
  6. Was the performance/fitness coach of the 2019/20 season brought in by the head coach or the club?
  7. Did you have a change of performance/fitness coach during the 2019/20 season?
  8. If answered yes at question 7, was the new performance/fitness coach during the ongoing 2019/20 season brought in by the head coach or by the club?
  9. Did you have a change of the main responsible team doctor before the 2019/20 season (= a new main responsible team doctor for the season)?
  10. Did you have a change of the head physiotherapist before the 2019/20 season (= a new head physiotherapist for the season)?
  11. Did you have a change of head coach before the 2020/21 season (= a new coach for the season)?
  12. Did you have a change of head coach during the 2020/21 season?
  13. If answered Yes at question 12: in which month did the change of head coach occur?
  14. Did you have a change of performance/fitness coach before the 2020/21 season (= a new performance/fitness coach for the season)?
  15. Was the performance/fitness coach of the 2020/21 season brought in by the head coach or by the club?
  16. Did you have a change of performance/fitness coach during the 2020/21 season?
  17. If answered yes at question 16, was the new performance/fitness coach during the ongoing 2020/21 season brought in by the head coach or by the club?
  18. Did you have a change of the main responsible team doctor before the 2020/21 season (= a new main responsible team doctor for the season)?
-

- 
19. Did you have a change of the head physiotherapist before the 2020/21 season (= a new head physiotherapist for the season)?
  20. Did you have a change of head coach before the 2021/22 season (= a new coach for the season)?
  21. Did you have a change of head coach during the 2021/22 season?
  22. If answered Yes at question 21: in which month did the change of head coach occur?
  23. Did you have a change of performance/fitness coach before the 2021/22 season (= a new performance/fitness coach for the season)?
  24. Was the performance/fitness coach of the 2021/22 season brought in by the head coach or by the club?
  25. Did you have a change of performance/fitness coach during the 2021/22 season?
  26. If answered yes at question 25, was the new performance/fitness coach during the ongoing 2021/22 season brought in by the head coach or by the club?
  27. Did you have a change of the main responsible team doctor before the 2021/22 season (= a new main responsible team doctor for the season)?
  28. Did you have a change of the head physiotherapist before the 2021/22 season (= a new head physiotherapist for the season)?
-
